# Supplementary material
Source: HighWire-hosted journal article supplement (https://bmjopen.bmj.com/content/8/12/e022700)
Supplement: inline-supplementary-material-4 [file inline-supplementary-material-4.pdf]

## Appendix 4 Outcomes of included studies

### **GENEVA, 2010<sup>46-48</sup> (DEX vs Sham)**

#### **Efficiency outcomes (changes from baseline at follow-up time points)**

| <b>6 months</b>             |                          |                           |                     |
|-----------------------------|--------------------------|---------------------------|---------------------|
|                             | <b>DEX 0.7mg (n=136)</b> | <b>DEX 0.35mg (n=154)</b> | <b>Sham (n=147)</b> |
| <b>BCVA (ETDRS letters)</b> | +0.1                     |                           | -1.8                |
| <b>p value</b>              | <0.001 vs sham           |                           |                     |
| <b>≥15 letters gained</b>   | 25 (18.4%)               | 11 (17%)                  | 18 (12.2%)          |
| <b>p value</b>              | NS vs sham               | NS vs sham                |                     |
| <b>≥15 letters lost</b>     | 19 (14.0%)               |                           | 30 (20.4%)          |
| <b>p value</b>              | NS vs sham               |                           |                     |
| <b>CRT (µm )</b>            | -118.2                   |                           | -125.3              |
| <b>p value</b>              | NS vs sham               |                           |                     |

| <b>12 months</b>            |                          |                           |                     |
|-----------------------------|--------------------------|---------------------------|---------------------|
|                             | <b>DEX 0.7mg (n=136)</b> | <b>DEX 0.35mg (n=154)</b> | <b>Sham (n=147)</b> |
| <b>BCVA (ETDRS letters)</b> | +2 (graph estimated)     |                           | -1.4 (ditto)        |
| <b>≥15 letters gained</b>   | 37 (27%)                 |                           | 31 (21%)            |

#### **Adverse events**

| <b>6 months</b>              |                          |                           |                     |
|------------------------------|--------------------------|---------------------------|---------------------|
|                              | <b>DEX 0.7mg (n=133)</b> | <b>DEX 0.35mg (n=154)</b> | <b>Sham (n=147)</b> |
| <b>Overall of ocular AEs</b> | 91 (68.4%)               |                           | 73 (49.7%)          |
| <b>IOP increased</b>         | 40 (30.1%)               |                           | 2 (1.4%)            |
| <b>Cataract AEs</b>          | 11 (8.3%)                |                           | 7 (4.8%)            |

### **ROVO, 2013<sup>49</sup> (Tria vs Sham)**

#### **Efficiency outcomes (changes from baseline at follow-up time points)**

| <b>12 months</b>            |                        |                   |                    |
|-----------------------------|------------------------|-------------------|--------------------|
|                             | <b>Tria 4mg (n=25)</b> | <b>RON (n=38)</b> | <b>Sham (n=20)</b> |
| <b>BCVA (ETDRS letters)</b> | -8                     | -35.5             | 0                  |

|                                                                      |                              |                              |                                |
|----------------------------------------------------------------------|------------------------------|------------------------------|--------------------------------|
| p value                                                              | NS vs sham                   |                              |                                |
| VA improvement                                                       | 5 (20%)                      | 18 (47.3%)                   | 2 (10%)                        |
| p value                                                              | NS vs sham                   |                              |                                |
| VA deterioration                                                     | NR                           | 3 (7.9%)                     | 7 (35%)                        |
| CRT (μm)                                                             | -235                         | -263                         | -206                           |
| p value                                                              | NS vs sham                   |                              |                                |
| Adverse events                                                       |                              |                              |                                |
| 12 months                                                            |                              |                              |                                |
|                                                                      | Tria 4mg (n=25)              | RON (n=38)                   | Sham (n=20)                    |
| IOP increased                                                        | 8 (32%)                      |                              | 0                              |
| Cataract progression                                                 | 6 (24%)                      | 5 (13.2%)                    | 3 (15%)                        |
| Neovascular glaucoma                                                 | 3 (12%)                      | 2 (5.3%)                     | 3 (15%)                        |
| Rubeosis iridis                                                      | 0                            |                              | 3 (15%)                        |
| SCORE, 2009 <sup>50-66</sup> (Tria vs sham)                          |                              |                              |                                |
| Efficiency outcomes (changes from baseline at follow-up time points) |                              |                              |                                |
| 6 months (weight mean and SD of 4 and 8 months)                      |                              |                              |                                |
|                                                                      | Tria 4mg (n=85)              | Tria 1mg(n=84)               | Obs (n=75)                     |
| BCVA (letters)                                                       | -0.15±20.67                  | -3.93±23.42                  | -9.66±18.04                    |
| p value                                                              | NR                           | NR                           |                                |
| ≥15 letters gained                                                   | 17 (19.5%)                   | 15(17.5%)                    | 3 (4%)                         |
| p value                                                              | NR                           | NR                           |                                |
| ≥15 letters lost                                                     | 19 (20.5%)                   | 21 (25.0%)                   | 31 (35.5%)                     |
| p value                                                              | NR                           | NR                           |                                |
| 12 months                                                            |                              |                              |                                |
|                                                                      | Tria 4mg (n=82)              | Tria 1mg(n=83)               | Obs (n=73)                     |
| BCVA (letters, 95%CI)                                                | -1.2±24.82<br>(-6.3 to +4.0) | -1.2±25.45<br>(-6.4 to +4.1) | -12.1±23.93<br>(-17.1 to -7.1) |
| p value                                                              | <0.05 vs obs                 | <0.05 vs obs                 |                                |
| ≥15 letters gained                                                   | 21 (25.6%)                   | 22 (26.5%)                   | 5 (6.8%)                       |
| p value                                                              | 0.001 vs obs                 | 0.001 vs obs                 |                                |

|                                                                             |                              |                               |                                |
|-----------------------------------------------------------------------------|------------------------------|-------------------------------|--------------------------------|
| <b>≥15 letters lost</b>                                                     | 21 (25.6%)                   | 21 (25.3%)                    | 32 (43.8%)                     |
| <b>p value</b>                                                              | NR                           | NR                            |                                |
| <b>CRT (μm) (median, IQR)</b>                                               | -261 (-407 to -79)<br>n=78   | -196 (-390 to -62)<br>n=72    | -277 (-418 to -40)<br>n=68     |
| <b>p value</b>                                                              | NR                           | NR                            |                                |
| <b>24 months</b>                                                            |                              |                               |                                |
|                                                                             | <b>Tria 4mg (n=50)</b>       | <b>Tria 1mg(n=55)</b>         | <b>Obs (n=46)</b>              |
| <b>BCVA (letters, 95%CI)</b>                                                | -2.4±24.89<br>(-9.3 to +4.4) | -4.4±26.87<br>(-11.5 to +2.8) | -10.7±22.84<br>(-17.4 to -4.1) |
| <b>p value</b>                                                              | NR                           |                               |                                |
| <b>≥15 letters gained</b>                                                   | 13 (26%)                     | 17 (30.9%)                    | 4 (8.7%)                       |
| <b>p value</b>                                                              | NR                           |                               |                                |
| <b>≥15 letters lost</b>                                                     | 13 (26%)                     | 17 (30.9%)                    | 22 (47.8%)                     |
| <b>p value</b>                                                              | NS, p=0.06 tria vs obs       |                               |                                |
| <b>CRT (μm) (median, IQR)</b>                                               | -236 (-421 to -63)<br>n=45   | -286 (-458 to -119)<br>n=48   | -304 (-465 to -108)<br>n=43    |
| <b>p value</b>                                                              | NR                           |                               |                                |
| <b>Adverse events</b>                                                       |                              |                               |                                |
| <b>12 months</b>                                                            |                              |                               |                                |
|                                                                             | <b>Tria 4mg (n=91)</b>       | <b>Tria 1mg(n=92)</b>         | <b>Obs (n=88)</b>              |
| <b>Initiation of IOP-lowering medication</b>                                | 32 (35.2%)                   | 18 (19.6%)                    | 7 (8.0%)                       |
| <b>Iris neovascularization or neovascular glaucoma</b>                      | 4 (4.4%)                     | 9 (9.8%)                      | 2 (2.3%)                       |
| <b>Retinal neovascularization</b>                                           | 2 (2.2%)                     | 2 (2.2%)                      | 4 (4.6%)                       |
| <b>Vitreous hemorrhage</b>                                                  | 0                            | 4 (4.3%)                      | 4 (4.6%)                       |
| <b>CRUISE, 2010<sup>67-69</sup> (IVR vs sham)</b>                           |                              |                               |                                |
| <b>Efficiency outcomes (changes from baseline at follow-up time points)</b> |                              |                               |                                |
| <b>6 months</b>                                                             |                              |                               |                                |
|                                                                             | <b>IVR 0.3mg (n=132)</b>     | <b>IVR 0.5mg (n=130)</b>      | <b>Sham (n=130)</b>            |
| <b>BCVA (letters, 95%CI)</b>                                                | +12.7±15.9<br>(9.9, 15.4)    | +14.9±13.2<br>(12.6, 17.2)    | +0.8±16.2<br>(-2.0, 3.6)       |
| <b>p value</b>                                                              | <0.0001 vs sham              | <0.0001 vs sham               |                                |

|                                           |                                  |                                 |                                  |
|-------------------------------------------|----------------------------------|---------------------------------|----------------------------------|
| <b>≥15 letters gained</b>                 | 61 (46.2%)                       | 62 (47.7%)                      | 22 (16.9%)                       |
| <b>p value</b>                            | <0.0001 vs sham                  | <0.0001 vs sham                 |                                  |
| <b>≥15 letters lost</b>                   | 5 (3.8%)                         | 2 (1.5%)                        | 20 (15.4%)                       |
| <b>p value</b>                            | NR                               |                                 |                                  |
| <b>CRT (μm, 95%CI)</b>                    | -433.7 (-484.9, -382.6)<br>n=131 | -452.3(-497.0, -407.6)<br>n=130 | -167.7 (-221.5, -114.0)<br>n=129 |
| <b>p value</b>                            | <0.0001 vs sham                  | <0.0001 vs sham                 |                                  |
| <b>NEI-VFQ (95%CI)</b>                    | +7.1 (5.2, 9.0)                  | +6.2 (4.3, 8.0)                 | +2.8 (0.8, 4.7)                  |
| <b>p value</b>                            | <0.05 vs sham                    | <0.05 vs sham                   |                                  |
| <b>12 months (IVR PRN)</b>                |                                  |                                 |                                  |
|                                           | <b>IVR 0.3mg (n=132)</b>         | <b>IVR 0.5mg (n=130)</b>        | <b>Sham (n=130)</b>              |
| <b>BCVA (letters, 95%CI)</b>              | +13.9±15.2<br>(11.2, 16.5)       | +13.9±14.2<br>(11.5, 16.4)      | +7.3±15.9<br>(4.5, 10.0)         |
| <b>p value</b>                            | 0.0007 vs sham                   | 0.0006 vs sham                  |                                  |
| <b>≥15 letters gained</b>                 | 62 (47.0%)                       | 66 (50.8%)                      | 43 (33.1%)                       |
| <b>p value</b>                            | NR                               |                                 |                                  |
| <b>≥15 letters lost</b>                   | 5 (3.8%)                         | 3 (2.3%)                        | 13 (10.0%)                       |
| <b>p value</b>                            | NR                               |                                 |                                  |
| <b>CRT (μm)</b>                           | -462.1                           | -452.8                          | -427.2                           |
| <b>p value</b>                            | NS vs sham                       | NS vs sham                      |                                  |
| <b>NEI-VFQ</b>                            | +7.1                             | +6.6                            | +5.0                             |
| <b>p value</b>                            | NR                               | NR                              |                                  |
| <b>Adverse events</b>                     |                                  |                                 |                                  |
| <b>6 months</b>                           |                                  |                                 |                                  |
|                                           | <b>IVR 0.3mg (n=132)</b>         | <b>IVR 0.5mg (n=129)</b>        | <b>Sham (n=129)</b>              |
| <b>Any intraocular inflammation event</b> | 3 (2.3%)                         | 2 (1.6%)                        | 5 (3.9%)                         |
| <b>Cataract</b>                           | 2 (1.5%)                         | 2 (1.6%)                        | 0                                |
| <b>Neovascular glaucoma</b>               | 0                                | 0                               | 2 (1.6%)                         |
| <b>Vitreous haemorrhage</b>               | 5 (3.8%)                         | 7 (5.4%)                        | 9 (7.0%)                         |
| <b>12 months</b>                          |                                  |                                 |                                  |
|                                           | <b>IVR 0.3mg (n=132)</b>         | <b>IVR 0.5mg (n=129)</b>        | <b>Sham (n=110)</b>              |

|                                           |          |          |          |
|-------------------------------------------|----------|----------|----------|
| <b>Any intraocular inflammation event</b> | 3 (2.3%) | 2 (1.6%) | 2 (1.8%) |
| <b>Cataract</b>                           | 5 (3.8%) | 9 (7.0%) | 2 (1.8%) |
| <b>Neovascular glaucoma</b>               | 0        | 1 (0.8%) | 0        |
| <b>Vitreous haemorrhage</b>               | 7 (5.3%) | 7 (5.4%) | 2 (1.8%) |
| <b>Iris neovascularization</b>            | 2 (1.5%) | 5 (3.9%) | 2 (1.8%) |
| <b>Retinal tear</b>                       | 0        | 2 (1.6%) | 2 (1.8%) |

### **ROCC, 2010<sup>70</sup> (IVR vs Sham)**

#### **Efficiency outcomes (changes from baseline at follow-up time points)**

|                       |                         |                    |
|-----------------------|-------------------------|--------------------|
| <b>6 months</b>       |                         |                    |
|                       | <b>IVR 0.5mg (n=15)</b> | <b>Sham (n=14)</b> |
| <b>BCVA (letters)</b> | +12±20                  | -1±17              |
| <b>p value</b>        | 0.067 vs sham           |                    |
| <b>CRT (µm)</b>       | -304±194                | -151±205           |
| <b>p value</b>        | 0.05 vs sham            |                    |

#### **Adverse events**

|                            |                         |                    |
|----------------------------|-------------------------|--------------------|
| <b>6 months</b>            |                         |                    |
|                            | <b>IVR 0.5mg (n=15)</b> | <b>Sham (n=14)</b> |
| <b>Vitreous hemorrhage</b> | 2 (13.3%)               | 0                  |
| <b>Retinal tear</b>        | 0                       | 1 (7.1%)           |
| <b>Neovascular disease</b> | 0                       | 1 (7.1%)           |

### **COPERNICUS, 2012<sup>71-72</sup> (IAI vs Sham)**

#### **Efficiency outcomes (changes from baseline at follow-up time points)**

|                           |                        |                    |
|---------------------------|------------------------|--------------------|
| <b>6 months</b>           |                        |                    |
|                           | <b>IAI 2mg (n=114)</b> | <b>Sham (n=73)</b> |
| <b>BCVA (letters)</b>     | +17.3±12.8             | -4.0±18            |
| <b>p value</b>            | <0.001                 |                    |
| <b>≥15 letters gained</b> | 64 (56.1%)             | 9 (12.3%)          |
| <b>p value</b>            | <0.001                 |                    |

|                                                          |                        |                    |
|----------------------------------------------------------|------------------------|--------------------|
| <b>≥15 letters lost</b>                                  | 2 (1.8%)               | 20 (27.4%)         |
| <b>p value</b>                                           | NR                     |                    |
| <b>CRT (μm)</b>                                          | -457.2                 | -144.8             |
| <b>p value</b>                                           | <0.001                 |                    |
| <b>NEI VFQ-25</b>                                        | +7.2±12.1              | +0.8±9.8           |
| <b>p value</b>                                           | 0.001                  |                    |
| <b>12 months (all IAI PRN)</b>                           |                        |                    |
|                                                          | <b>IAI 2mg (n=114)</b> | <b>Sham (n=73)</b> |
| <b>BCVA (letters)</b>                                    | +16.2                  | +3.8               |
| <b>p value</b>                                           | <0.001                 |                    |
| <b>≥15 letters gained</b>                                | 63 (55.3%)             | 22 (30.1%)         |
| <b>p value</b>                                           | <0.001                 |                    |
| <b>≥15 letters lost</b>                                  | 6 (5.3%)               | 11 (15.1%)         |
| <b>p value</b>                                           | NR                     |                    |
| <b>CRT (μm)</b>                                          | -413.0                 | -381.8             |
| <b>p value</b>                                           | NS                     |                    |
| <b>NEI VFQ-25</b>                                        | +7.5                   | +5.1               |
| <b>p value</b>                                           | NS                     |                    |
| <b>Adverse events</b>                                    |                        |                    |
| <b>6 months</b>                                          |                        |                    |
|                                                          | <b>IAI 2mg (n=114)</b> | <b>Sham (n=74)</b> |
| <b>Patients with at least one serious adverse events</b> | 4 (3.5%)               | 10 (13.5%)         |
| <b>Vitreous hemorrhage</b>                               | 0                      | 4 (5.4%)           |
| <b>Neovascular glaucoma</b>                              | 0                      | 2 (2.7%)           |
| <b>Iris neovascularization</b>                           | 0                      | 2 (2.7%)           |
| <b>Retinal hemorrhage</b>                                | 0                      | 2 (2.7%)           |
| <b>Retinal tear</b>                                      | 0                      | 1 (1.4%)           |
| <b>Endophthalmitis</b>                                   | 1 (0.9%)               | 0                  |
| <b>6 to 12months</b>                                     |                        |                    |

|                                                          | IAI 2mg + PRN (n=110) | Sham + PRN (n=60) |
|----------------------------------------------------------|-----------------------|-------------------|
| <b>Patients with at least one serious adverse events</b> | 3 (2.7%)              | 2 (3.3%)          |
| <b>Vitreous hemorrhage</b>                               | 1 (0.9%)              | 1 (1.7%)          |
| <b>Glaucoma</b>                                          | 0                     | 1 (1.7%)          |
| <b>Retinal tear</b>                                      | 0                     | 1 (1.7%)          |
| <b>Cataract</b>                                          | 1 (0.9%)              | 1 (1.7%)          |

### **GALILEO, 2013<sup>73-74</sup> (IAI vs Sham)**

#### **Efficiency outcomes (changes from baseline at follow-up time points)**

| <b>6 months</b>           |                 |             |
|---------------------------|-----------------|-------------|
|                           | IAI 2mg (n=103) | Sham (n=68) |
| <b>BCVA (letters)</b>     | +18.0±12.2      | +3.3±14.1   |
| <b>p value</b>            | <0.0001         |             |
| <b>≥15 letters gained</b> | 62 (60.2%)      | 15 (22.1%)  |
| <b>p value</b>            | <0.0001         |             |
| <b>≥15 letters lost</b>   | 8 (7.8%)        | 15 (22.1%)  |
| <b>p value</b>            | 0.0033          |             |
| <b>CRT (μm)</b>           | -448.6          | -169.3      |
| <b>p value</b>            | <0.0001         |             |
| <b>NEI-VFQ-25</b>         | +7.5            | +3.5        |
| <b>p value</b>            | 0.0013          |             |

#### **Adverse events**

| <b>6 months</b>                 |                 |             |
|---------------------------------|-----------------|-------------|
|                                 | IAI 2mg (n=104) | Sham (n=68) |
| <b>Eye pain</b>                 | 12 (11.5%)      | 3 (4.4%)    |
| <b>Conjunctival haemorrhage</b> | 9 (8.7%)        | 3 (4.4%)    |
| <b>Ocular hyperaemia</b>        | 5 (4.8%)        | 4 (5.9%)    |
| <b>Vitreous floaters</b>        | 5 (4.8%)        | 0           |
| <b>Macular ischaemia</b>        | 4 (3.8%)        | 3 (4.4%)    |

|                   |           |           |
|-------------------|-----------|-----------|
| Eye irritation    | 3 (2.9%)  | 7 (10.3%) |
| Retinal ischaemia | 1 (1.0%)  | 3 (4.4%)  |
| IOP increased     | 10 (9.6%) | 4 (5.9%)  |

#### **Epstein, 2012<sup>75-76</sup> (IVB vs Sham)**

##### **Efficiency outcomes (changes from baseline at follow-up time points)**

###### **6 months**

|                    | <b>IVB 1.25mg (n=30)</b> | <b>Sham (n=30)</b> |
|--------------------|--------------------------|--------------------|
| BCVA (letters)     | +14.1±18.7               | -2.0±20.5          |
| p value            | <0.01                    |                    |
| ≥15 letters gained | 18 (60%)                 | 6 (20%)            |
| p value            | 0.003                    |                    |
| ≥15 letters lost   | 2 (6.7%)                 | 7 (23.3%)          |
| p value            | NS, 0.146                |                    |
| CRT (μm)           | -426                     | -102               |
| p value            | <0.0001                  |                    |

###### **12 months**

|                    | <b>IVB 1.25mg (n=30)</b> | <b>Sham (n=30)</b> |
|--------------------|--------------------------|--------------------|
| BCVA (letters)     | +16.1                    | +4.6               |
| p value            | <0.05                    |                    |
| ≥15 letters gained | 18 (60%)                 | 10 (33.3%)         |
| p value            | <0.05                    |                    |
| ≥15 letters lost   | 2 (6.7%)                 | 2 (6.7%)           |
| p value            | NS                       |                    |
| CRT (μm)           | -435                     | -404               |
| p value            | >0.05                    |                    |

##### **Adverse events**

###### **6 months**

|               | <b>IVB 1.25mg (n=30)</b> | <b>Sham (n=30)</b> |
|---------------|--------------------------|--------------------|
| Iris rubeosis | 0                        | 5 (16.7%)          |



---

**Wroblewski, 2009<sup>23, 77-83</sup> (IVP vs Sham)**

---

**Efficiency outcomes (changes from baseline at follow-up time points)**

---

**6 months (~30weeks)**

---

|                           | <b>IVP 0.3mg (n=33)</b> | <b>IVP 1mg (n=33)</b> | <b>Sham (n=32)</b> |
|---------------------------|-------------------------|-----------------------|--------------------|
| <b>BCVA (letters)</b>     | +7.1                    | +9.9                  | -3.2               |
| <b>p value</b>            | 0.09 vs sham            | 0.02 vs sham          |                    |
| <b>≥15 letters gained</b> | 12 (36.4%)              | 13 (36.1%)            | 9 (28.1%)          |
| <b>p value</b>            | 0.48                    |                       |                    |
| <b>≥15 letters lost</b>   | 3 (9.1%)                | 2 (6.1%)              | 10 (31.3%)         |
| <b>p value</b>            | 0.03 vs sham            | 0.01 vs sham          |                    |
| <b>CRT (μm)</b>           | -243                    | -179                  | -148               |
| <b>p value</b>            | 0.13                    | 0.06                  |                    |

**12 months**

---

|                       | <b>IVP 0.3mg (n=33)</b> | <b>IVP 1mg (n=33)</b> | <b>Sham (n=32)</b> |
|-----------------------|-------------------------|-----------------------|--------------------|
| <b>BCVA (letters)</b> | +7.5                    | +6.3                  | -2.4               |
| <b>p value</b>        | NS vs sham              | NS vs sham            |                    |
| <b>CRT (μm)</b>       | -295                    | -216                  | -183               |
| <b>p value</b>        | <0.05 vs sham           |                       |                    |

**Adverse events**

---

No serious ocular adverse events up to 30 weeks. No evidence of increased risk of systemic adverse events up to 30 weeks.

---

---

**Ramezani, 2014<sup>84</sup> (IVB vs Tria)**

---

**Efficiency outcomes (changes from baseline at follow-up time points)**

---

**6 months**

---

|                       | <b>IVB (n=43)</b> | <b>Tria (n=43)</b> |
|-----------------------|-------------------|--------------------|
| <b>BCVA (letters)</b> | +23±11.5          | +9.5±11.5          |
| <b>p value</b>        | <0.001            | <0.001             |
| <b>CRT (μm)</b>       | -151±122          | -75±89             |
| <b>p value</b>        | <0.001            | <0.001             |

---

**Adverse events****6 months**

|                           | <b>IVB (n=43)</b> | <b>Tria (n=43)</b> |
|---------------------------|-------------------|--------------------|
| <b>IOP changes (mmHg)</b> | -1.0±2.2          | +2.2±2.7           |

**COMRADE-C, 2016<sup>85</sup> (IVR vs DEX)****Efficiency outcomes (changes from baseline at follow-up time points)****6 months**

|                           | <b>IVR (n=124)</b> | <b>DEX (n=119)</b> |
|---------------------------|--------------------|--------------------|
| <b>BCVA (letters)</b>     | +16.9±13.6         | -0.7±22.5          |
| <b>p value</b>            | <0.0001 vs DEX     |                    |
| <b>≥15 letters gained</b> | 73 (58.9%)         | 22 (18.5%)         |
| <b>p value</b>            | <0.0001 vs DEX     |                    |
| <b>≥15 letters lost</b>   | 1 (0.8%)           | 31 (26.1%)         |
| <b>p value</b>            | <0.0001 vs DEX     |                    |
| <b>CRT (μm)</b>           | -376.7±274.9       | -168.7±288.3       |
| <b>p value</b>            | NR                 |                    |

**Adverse events****6 months**

|                                | <b>IVR (n=124)</b> | <b>DEX (n=119)</b> |
|--------------------------------|--------------------|--------------------|
| <b>IOP increased</b>           | 7 (5.6%)           | 38 (31.9%)         |
| <b>Macular edema</b>           | 14 (11.3%)         | 21 (17.6%)         |
| <b>Eye pain</b>                | 15 (12.1%)         | 15 (12.6%)         |
| <b>VA reduced</b>              | 8 (6.5%)           | 22 (18.5%)         |
| <b>Conjunctival hemorrhage</b> | 16 (12.9%)         | 13 (10.9%)         |
| <b>Vitreous floaters</b>       | 5 (4.0%)           | 11 (9.2%)          |
| <b>Iris neovascularization</b> | 0 (0.0%)           | 9 (7.6%)           |
| <b>Dry eye</b>                 | 4 (3.2%)           | 4 (3.4%)           |
| <b>Glaucoma</b>                | 0 (0.0%)           | 8 (6.7%)           |
| <b>Visual impairment</b>       | 2 (1.6%)           | 6 (5.0%)           |

|                                     |          |          |
|-------------------------------------|----------|----------|
| <b>Vitreous detachment</b>          | 5 (4.0%) | 3 (2.5%) |
| <b>Eye irritation</b>               | 4 (3.2%) | 3 (2.5%) |
| <b>Retinal ischemia</b>             | 1 (0.8%) | 6 (5.0%) |
| <b>Retinal vascular disorder</b>    | 2 (1.6%) | 5 (4.2%) |
| <b>Ocular hypertension</b>          | 0        | 6 (5.0%) |
| <b>Retinal exudates</b>             | 2 (1.6%) | 4 (3.4%) |
| <b>Optic disc vascular disorder</b> | 5 (4.0)  | 0        |
