# Supplementary material
Source: HighWire-hosted journal article supplement (https://bmjopen.bmj.com/content/8/12/e022700)
Supplement: inline-supplementary-material-5 [file inline-supplementary-material-5.pdf]

## Appendix 5 Risk of bias of individual studies

| <b>Trials</b>                        | <b>Random sequence generation (selection bias)</b> | <b>Allocation concealment (selection bias)</b> | <b>Blinding of participants and personnel (performance bias)</b>                                                                                                 | <b>Blinding of outcome assessment (detection bias)</b> | <b>Incomplete outcome data (attrition bias)</b>                                                                                                                                                                   | <b>Selective reporting (reporting bias)</b> | <b>Other bias</b> |
|--------------------------------------|----------------------------------------------------|------------------------------------------------|------------------------------------------------------------------------------------------------------------------------------------------------------------------|--------------------------------------------------------|-------------------------------------------------------------------------------------------------------------------------------------------------------------------------------------------------------------------|---------------------------------------------|-------------------|
| <b>GENEVA, 2010</b> <sup>46-48</sup> | Low                                                | Low                                            | High: Personnel administering treatments were not masked. Participants were masked to dose of implant, but not to treatment (steroid implant versus no implant). | Low                                                    | High: Macular thickness was described as a secondary outcome in the trial registry for one trial only, but the 6-month reported results used the pooled data from both trials to analyze this outcome at 6 months | Low                                         | Unclear           |
| <b>ROVO, 2013</b> <sup>49</sup>      | Low                                                | Low                                            | Unclear                                                                                                                                                          | Unclear                                                | Low                                                                                                                                                                                                               | Low                                         | Unclear           |
| <b>SCORE, 2009</b> <sup>50-66</sup>  | Low                                                | Low                                            | High: physicians and patients masked to dose but not triamcinolone versus observation                                                                            | Low                                                    | High: In the observation arm, 17% of participants had missing data compared with the 6.8% observed risk for the primary outcome. Reasons for missing data were not reported.                                      | Low                                         | Unclear           |

| <b>Trials</b>                                          | <b>Random<br/>sequence<br/>generation<br/>(selection bias)</b> | <b>Allocation<br/>concealment<br/>(selection bias)</b> | <b>Blinding of<br/>participants and<br/>personnel<br/>(performance bias)</b>                              | <b>Blinding of<br/>outcome<br/>assessment<br/>(detection<br/>bias)</b> | <b>Incomplete outcome<br/>data (attrition bias)</b> | <b>Selective<br/>reporting<br/>(reporting<br/>bias)</b> | <b>Other bias</b> |
|--------------------------------------------------------|----------------------------------------------------------------|--------------------------------------------------------|-----------------------------------------------------------------------------------------------------------|------------------------------------------------------------------------|-----------------------------------------------------|---------------------------------------------------------|-------------------|
| <b>CRUISE,</b><br><b>2010</b> <sup>67-69</sup>         | Low                                                            | Unclear                                                | Low                                                                                                       | Low                                                                    | Unclear                                             | Low                                                     | Unclear           |
| <b>ROCC,</b><br><b>2010</b> <sup>70</sup>              | Unclear                                                        | Low                                                    | Low                                                                                                       | Low                                                                    | Unclear                                             | Low                                                     | Unclear           |
| <b>COPERNICUS,</b><br><b>2012</b> <sup>71-72</sup>     | Low                                                            | Unclear                                                | Low                                                                                                       | Low                                                                    | Unclear                                             | Low                                                     | Low               |
| <b>GALILEO ,</b><br><b>2013</b> <sup>73-74</sup>       | Unclear                                                        | Unclear                                                | Low                                                                                                       | Low                                                                    | Unclear                                             | Low                                                     | Unclear           |
| <b>EPSTEIN,</b><br><b>2012</b> <sup>75-77</sup>        | Unclear                                                        | Low                                                    | Low                                                                                                       | Low                                                                    | Low                                                 | Low                                                     | Low               |
| <b>Wroblewski,</b><br><b>2009</b> <sup>23, 78-83</sup> | Low                                                            | Low                                                    | Low                                                                                                       | Low                                                                    | Unclear                                             | Low                                                     | Unclear           |
| <b>Ramezani,</b><br><b>2014</b> <sup>84</sup>          | Low                                                            | Low                                                    | High: Because IVT<br>might cause floaters, we<br>did not consider this<br>study as a double-blind<br>one. | Low                                                                    | Low                                                 | Low                                                     | Unclear           |
| <b>COMRADE-C,</b><br><b>2016</b> <sup>85</sup>         | Low                                                            | Low                                                    | Low                                                                                                       | Low                                                                    | Unclear                                             | Low                                                     | Unclear           |
